# Supplementary material for: Improving the estimation of mesophyll conductance to CO2: on the role of electron transport rate correction and respiration
Source: PubMed Central journal article supplement — J Exp Bot. 2013 Jul 5;64(11):3285–98. doi: 10.1093/jxb/ert168 (PMC3733151; doi:10.1093/jxb/ert168), 2013-07-05
Supplement: supp_ert168_jexbot096339_file001.pdf [file supp_ert168_jexbot096339_file001.pdf]

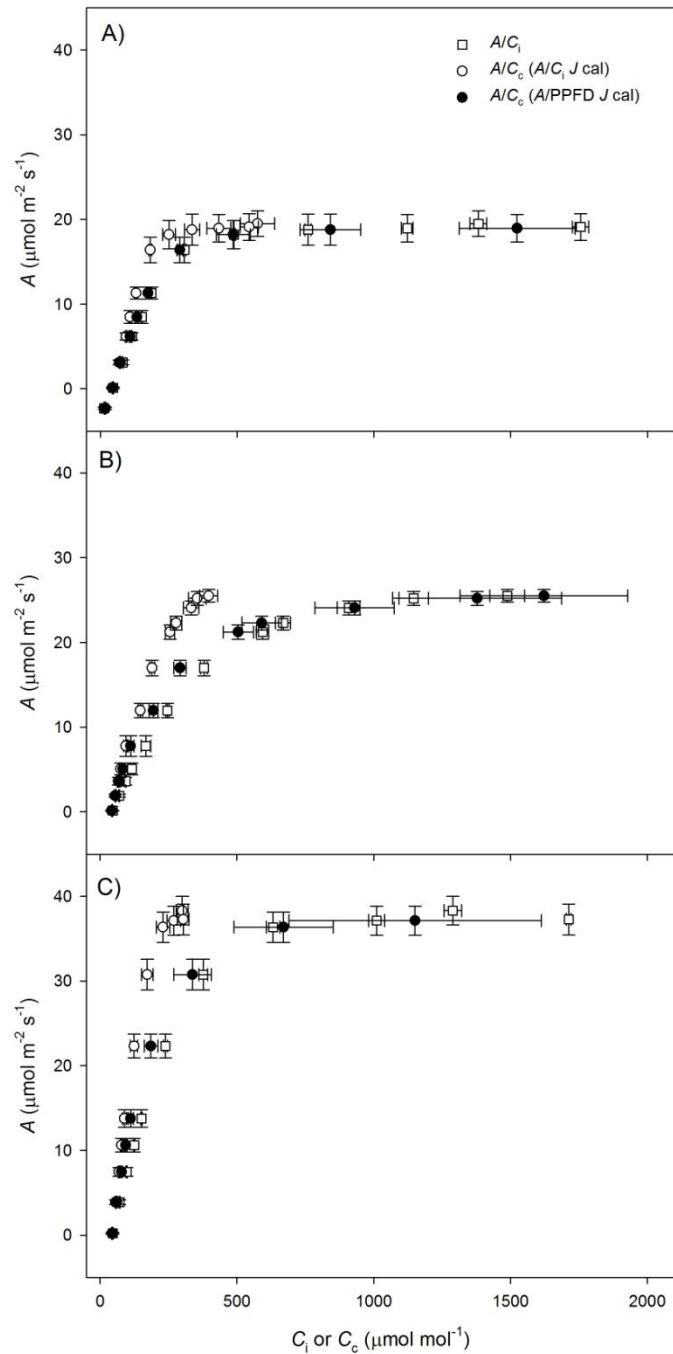

**Figure S1.** Response of net photosynthesis ( $A$ ) to sub-stomatal  $\text{CO}_2$  concentrations ( $C_i$ , empty squares) or to chloroplast  $\text{CO}_2$  concentration ( $C_c$ ) where  $C_c$  was obtained using the  $A/C_i$   $J$  calibration (empty circles) or the  $A/\text{PPFD } J$  calibration (filled circles) in (A) *Nicotiana tabacum*; (B) *Coffea arabica* and (C) *Limonium gibertii*. Values are averages  $\pm$ SE of four to six replicates, depending on the species. Note that the  $A/C_i$  curves were repeated to facilitate the comparison with their respective  $A/C_c$  curves.

**Table S1.** Corrections in CO<sub>2</sub> and water vapour flux rates because of diffusion leaks. The leak in  $A$  ( $\mu\text{mol CO}_2 \text{ m}^{-2} \text{ s}^{-1}$ ) was calculated as following: Leak in  $A = (A_{\text{corrected}} - A_{\text{non-corrected}})$ ; after, we calculated the relative proportion of the leak in relation to the non-corrected value ( $A_{\text{nc}}$ ) as % of  $A_{\text{nc}} = (| \text{Leak in } A | / | A_{\text{nc}} |) * 100$ . Leaks for water vapour affecting leaf transpiration ( $E$ ) were calculated accordingly but note the different units ( $\text{mmol H}_2\text{O m}^{-2} \text{ s}^{-1}$ ).  $C_a$  refers to the chamber CO<sub>2</sub> concentration. Corrections are shown only for  $A/C_i$  curves; for  $A/\text{PPFD}$  curves, there were not major differences among species and the average % of  $A_{\text{nc}}$  at  $\text{PPFD} > 400$  and  $\text{PPFD} < 400 \mu\text{mol m}^{-2} \text{ s}^{-1}$  were *c.* 2 and 5%, respectively. % of  $E_{\text{nc}}$  were in the same magnitude as those shown for  $A/C_i$  curves.

| $C_a$ | <i>N. tabacum</i> |                      |             |                      | <i>C. arabica</i> |                      |             |                      | <i>L. gibertii</i> |                      |             |                      |
|-------|-------------------|----------------------|-------------|----------------------|-------------------|----------------------|-------------|----------------------|--------------------|----------------------|-------------|----------------------|
|       | Leak in $A$       | % of $A_{\text{nc}}$ | Leak in $E$ | % of $E_{\text{nc}}$ | Leak in $A$       | % of $A_{\text{nc}}$ | Leak in $E$ | % of $E_{\text{nc}}$ | Leak in $A$        | % of $A_{\text{nc}}$ | Leak in $E$ | % of $E_{\text{nc}}$ |
| 50    | 0.88              | 117.9                | 0.09        | 1.6                  | 0.78              | 122.9                | 0.10        | 5.4                  | 0.88               | 143.7                | 0.07        | 1.6                  |
| 100   | 0.80              | 36.1                 | 0.09        | 1.6                  | 0.68              | 62.4                 | 0.09        | 5.8                  | 0.81               | 51.5                 | 0.06        | 1.6                  |
| 150   | 0.73              | 13.6                 | 0.09        | 1.6                  | 0.58              | 22.0                 | 0.09        | 6.1                  | 0.74               | 18.5                 | 0.07        | 1.6                  |
| 200   | 0.65              | 8.5                  | 0.09        | 1.6                  | 0.47              | 11.7                 | 0.09        | 6.5                  | 0.65               | 9.2                  | 0.07        | 1.6                  |
| 250   | 0.59              | 5.5                  | 0.09        | 1.6                  | 0.27              | 4.2                  | 0.09        | 6.8                  | 0.57               | 5.9                  | 0.07        | 1.6                  |
| 400   | 0.33              | 2.1                  | 0.09        | 1.6                  | 0.06              | 0.7                  | 0.10        | 5.2                  | 0.39               | 2.2                  | 0.07        | 1.6                  |
| 600   | 0.06              | 0.3                  | 0.09        | 1.6                  | -0.35             | 2.0                  | 0.10        | 5.3                  | 0.07               | 0.3                  | 0.07        | 1.6                  |
| 900   | -0.43             | 2.3                  | 0.08        | 1.6                  | -0.97             | 4.4                  | 0.10        | 5.5                  | -0.37              | 1.1                  | 0.07        | 1.6                  |
| 1300  | -1.04             | 5.3                  | 0.07        | 1.6                  | -1.81             | 7.0                  | 0.10        | 6.0                  | -1.02              | 2.9                  | 0.07        | 1.6                  |
| 1600  | -1.48             | 7.1                  | 0.06        | 1.6                  | -2.43             | 8.8                  | 0.10        | 6.4                  | -1.49              | 4.0                  | 0.07        | 1.6                  |
| 2000  | -2.09             | 10.0                 | 0.06        | 2.0                  | -3.26             | 11.4                 | 0.09        | 6.9                  | -2.12              | 5.6                  | 0.08        | 2.0                  |

**Table S2.** Averaged mesophyll conductance ( $g_m$ , mol CO<sub>2</sub> m<sup>-2</sup> s<sup>-1</sup>) for the interval of  $C_i$  between 100 and 350  $\mu\text{mol mol}^{-1}$  and the punctual  $g_m$  at ambient CO<sub>2</sub> concentration (400  $\mu\text{mol mol}^{-1}$ ). % DE is the percentage of data excluded after the restriction is applied ( $g_m$  restricted to the range of  $0 < g_m < 1$ ). The  $\alpha\beta$  for the  $J$  calibrations are those described in Table 2 in addition to the standard  $\alpha\beta$  of 0.42.  $R_{\text{dark}}/2$  was used for these  $g_m$  estimates.

|                    |                                                     | $C_i$ (100-350) |                   | Amb CO <sub>2</sub> (400 $\mu\text{mol mol}^{-1}$ ) |                   |
|--------------------|-----------------------------------------------------|-----------------|-------------------|-----------------------------------------------------|-------------------|
|                    |                                                     | % DE            | $g_m$             | % DE                                                | $g_m$             |
| <i>N. tabacum</i>  | $\Phi_{\text{PSII}}/\Phi_{\text{CO}_2}$ ( $A/C_i$ ) | 6               | $0.287 \pm 0.037$ | 0                                                   | $0.152 \pm 0.015$ |
|                    | $\Phi_{\text{PSII}}/\Phi_{\text{CO}_2}$ (PPFD>400)  | 88              | $0.504 \pm 0.262$ | 100                                                 | -                 |
|                    | Y <sub>in</sub> (PPFD<400)                          | 94              | 0.377             | 100                                                 | -                 |
|                    | Y <sub>in</sub> (PPFD<400 $C_i$ >500)               | 25              | $0.458 \pm 0.074$ | 0                                                   | $0.273 \pm 0.048$ |
|                    | Standard                                            | 75              | $0.514 \pm 0.118$ | 75                                                  | 0.461             |
| <i>C. arabica</i>  | $\Phi_{\text{PSII}}/\Phi_{\text{CO}_2}$ ( $A/C_i$ ) | 0               | $0.124 \pm 0.007$ | 0                                                   | $0.133 \pm 0.014$ |
|                    | $\Phi_{\text{PSII}}/\Phi_{\text{CO}_2}$ (PPFD>400)  | 6               | $0.191 \pm 0.029$ | 20                                                  | $0.269 \pm 0.084$ |
|                    | Y <sub>in</sub> (PPFD<400)                          | 0               | $0.220 \pm 0.043$ | 0                                                   | $0.353 \pm 0.122$ |
|                    | Y <sub>in</sub> (PPFD<400 $C_i$ >500)               | 0               | $0.108 \pm 0.006$ | 0                                                   | $0.110 \pm 0.009$ |
|                    | Standard                                            | 44              | $0.332 \pm 0.085$ | 80                                                  | 0.945             |
| <i>L. gibertii</i> | $\Phi_{\text{PSII}}/\Phi_{\text{CO}_2}$ ( $A/C_i$ ) | 0               | $0.228 \pm 0.020$ | 0                                                   | $0.208 \pm 0.026$ |
|                    | $\Phi_{\text{PSII}}/\Phi_{\text{CO}_2}$ (PPFD>400)  | 21              | $0.406 \pm 0.083$ | 50                                                  | $0.247 \pm 0.053$ |
|                    | Y <sub>in</sub> (PPFD<400)                          | 43              | $0.245 \pm 0.024$ | 50                                                  | $0.239 \pm 0.048$ |
|                    | Y <sub>in</sub> (PPFD<400 $C_i$ >500)               | 0               | $0.246 \pm 0.022$ | 0                                                   | $0.231 \pm 0.034$ |
|                    | Standard                                            | 36              | $0.296 \pm 0.065$ | 50                                                  | $0.226 \pm 0.042$ |

**Table S3.** Same as Table S2, but  $R_{AC_i/AC_c}$ , the respiration estimate from combined  $A/C_i$  and  $A/C_c$  curves proposed in this study, was used in the  $g_m$  estimates instead of  $R_{dark/2}$ .

|                    |                                       | $C_i$ (100-350) |                   | Amb $CO_2$ (400 $\mu\text{mol mol}^{-1}$ ) |                   |
|--------------------|---------------------------------------|-----------------|-------------------|--------------------------------------------|-------------------|
|                    |                                       | % DE            | $g_m \pm SE$      | % DE                                       | $g_m \pm SE$      |
| <i>N. tabacum</i>  | $\Phi_{PSII}/\Phi_{CO_2}$ ( $A/C_i$ ) | 0               | $0.213 \pm 0.021$ | 0                                          | $0.132 \pm 0.014$ |
|                    | $\Phi_{PSII}/\Phi_{CO_2}$ (PPFD>400)  | 50              | $0.468 \pm 0.064$ | 50                                         | $0.435 \pm 0.111$ |
|                    | Yin (PPFD<400)                        | 88              | $0.560 \pm 0.317$ | 100                                        | -                 |
|                    | Yin (PPFD<400 $C_i$ >500)             | 0               | $0.324 \pm 0.041$ | 0                                          | $0.190 \pm 0.024$ |
|                    | Standard                              | 38              | $0.484 \pm 0.073$ | 0                                          | $0.400 \pm 0.105$ |
| <i>C. arabica</i>  | $\Phi_{PSII}/\Phi_{CO_2}$ ( $A/C_i$ ) | 0               | $0.117 \pm 0.006$ | 0                                          | $0.125 \pm 0.012$ |
|                    | $\Phi_{PSII}/\Phi_{CO_2}$ (PPFD>400)  | 0               | $0.186 \pm 0.029$ | 0                                          | $0.276 \pm 0.080$ |
|                    | Yin (PPFD<400)                        | 0               | $0.176 \pm 0.023$ | 0                                          | $0.248 \pm 0.062$ |
|                    | Yin (PPFD<400 $C_i$ >500)             | 0               | $0.103 \pm 0.005$ | 0                                          | $0.106 \pm 0.008$ |
|                    | Standard                              | 31              | $0.312 \pm 0.065$ | 80                                         | 0.378             |
| <i>L. gibertii</i> | $\Phi_{PSII}/\Phi_{CO_2}$ ( $A/C_i$ ) | 0               | $0.214 \pm 0.014$ | 0                                          | $0.198 \pm 0.020$ |
|                    | $\Phi_{PSII}/\Phi_{CO_2}$ (PPFD>400)  | 7               | $0.371 \pm 0.044$ | 25                                         | $0.393 \pm 0.137$ |
|                    | Yin (PPFD<400)                        | 7               | $0.428 \pm 0.058$ | 0                                          | $0.447 \pm 0.199$ |
|                    | Yin (PPFD<400 $C_i$ >500)             | 0               | $0.228 \pm 0.013$ | 0                                          | $0.216 \pm 0.025$ |
|                    | Standard                              | 7               | $0.367 \pm 0.040$ | 25                                         | $0.352 \pm 0.118$ |

Values are means  $\pm$  standard error (SE) of four to six  $A/C_i$  curves per species. The SE was calculated according to the points that remained in each  $C_i$  interval after the restriction was applied. Same statistics for Table S1. When SE is not shown, only one observation remained as valid.

**Table S4.** Mesophyll conductance ( $g_m$ , mol CO<sub>2</sub> m<sup>-2</sup> s<sup>-1</sup>) for several intervals of  $C_i$  and percentage of data excluded (DE) after applying two restrictions ( $g_m$  restricted to the range of  $0 < g_m < 1$  mol CO<sub>2</sub> m<sup>-2</sup> s<sup>-1</sup> and  $dC_c/dA$  of 10-50, the Harley *et al.* (1992) criteria). The  $A/C_i$  or  $A/PPFD$   $J$  calibration refers to the  $\Phi_{PSII}/\Phi_{CO_2}$  ( $A/C_i$ ) or  $A/PPFD$  methods, respectively.  $R_{ACi/ACc}$  is the light respiration estimate from the combined  $A/C_i$  and  $A/C_c$  curves proposed in this study, and  $R_{dark/2}$  is the dark respiration divided per two to account for the observed reduction in  $R_{dark}$  under light (Niinemets *et al.*, 2005).

|                    | $A/C_i J$ calibration |        |                   |        | $A/PPFD J$ calibration |        |                   |        |
|--------------------|-----------------------|--------|-------------------|--------|------------------------|--------|-------------------|--------|
|                    | $R_{ACi/ACc}$         |        | $R_{dark/2}$      |        | $R_{ACi/ACc}$          |        | $R_{dark/2}$      |        |
|                    | $g_m$                 | DE (%) | $g_m$             | DE (%) | $g_m$                  | DE (%) | $g_m$             | DE (%) |
| <i>N. tabacum</i>  |                       |        |                   |        |                        |        |                   |        |
| $C_i < 100$        | $0.274 \pm 0.099$     | 67     | 0.261             | 92     | $0.238 \pm 0.092$      | 67     | $0.199 \pm 0.043$ | 75     |
| $C_i$ 100-350      | $0.183 \pm 0.036$     | 56     | $0.328 \pm 0.115$ | 75     | $0.588 \pm 0.042$      | 88     | -                 | 100    |
| $C_i > 350$        | $0.035 \pm 0.008$     | 70     | $0.038 \pm 0.008$ | 70     | $0.321 \pm 0.057$      | 90     | $0.392 \pm 0.388$ | 90     |
| <i>C. arabica</i>  |                       |        |                   |        |                        |        |                   |        |
| $C_i < 100$        | -                     | 100    | 0.297             | 94     | $0.195 \pm 0.056$      | 75     | $0.219 \pm 0.047$ | 44     |
| $C_i$ 100-350      | $0.116 \pm 0.010$     | 44     | $0.127 \pm 0.010$ | 38     | $0.200 \pm 0.037$      | 6      | $0.194 \pm 0.030$ | 13     |
| $C_i > 350$        | $0.057 \pm 0.004$     | 29     | $0.065 \pm 0.005$ | 41     | $0.152 \pm 0.038$      | 91     | $0.115 \pm 0.008$ | 94     |
| <i>L. gibertii</i> |                       |        |                   |        |                        |        |                   |        |
| $C_i < 100$        | $0.230 \pm 0.026$     | 13     | $0.271 \pm 0.052$ | 13     | $0.287 \pm 0.015$      | 33     | $0.285 \pm 0.118$ | 53     |
| $C_i$ 100-350      | $0.278 \pm 0.023$     | 86     | $0.329 \pm 0.018$ | 86     | $0.352 \pm 0.063$      | 21     | $0.398 \pm 0.114$ | 36     |
| $C_i > 350$        | $0.019 \pm 0.000$     | 95     | $0.019 \pm 0.000$ | 95     | $0.034 \pm 0.007$      | 84     | $0.041 \pm 0.008$ | 79     |

Values are the means  $\pm$  standard error (SE) of four to six  $A/C_i$  curves per species. The SE was calculated according to the points that remained in each  $C_i$  interval after applying the restriction. When SE is not shown, only one valid observation remained.

**Table S5.** Maximum carboxylation rate of Rubisco ( $V_{\text{cmax}}$ ,  $\mu\text{mol CO}_2 \text{ m}^{-2} \text{ s}^{-1}$ ) and maximum electron transport rate from gas-exchange ( $J_{\text{max}}$ ,  $\mu\text{mol e}^- \text{ m}^{-2} \text{ s}^{-1}$ ) as affected by the different  $J$  calibrations. All photosynthetic parameters were calculated on a  $C_i$  basis from  $A/C_i$  curves and on a  $C_c$  basis from  $A/C_c$  curves using measured Rubisco kinetic constants ( $\Gamma^*$ ,  $K_c$  and  $K_o$ ) in this study (as reported in Table 1). For these  $V_{\text{cmax}}$  and  $J_{\text{max}}$ ,  $R_{\text{dark}/2}$  was used. For comparison, see the values calculated with  $R_{\text{ACi}/\text{Acc}}$  in Table 5. Note that the parameters calculated on a  $C_i$  basis are independent of  $J$  calibration.

|                    |                                                     | On $C_c$ basis    |                  | On $C_i$ basis    |                  |
|--------------------|-----------------------------------------------------|-------------------|------------------|-------------------|------------------|
|                    |                                                     | $V_{\text{cmax}}$ | $J_{\text{max}}$ | $V_{\text{cmax}}$ | $J_{\text{max}}$ |
| <i>N. tabacum</i>  | $\Phi_{\text{PSII}}/\Phi_{\text{CO}_2}$ ( $A/C_i$ ) | 102.5 ± 9.1       | 103.2 ± 10.5     | 77.4 ± 4.7        | 90.6 ± 7.3       |
|                    | $\Phi_{\text{PSII}}/\Phi_{\text{CO}_2}$ (PPFD>400)  | 76.1 ± 5.8        | 84.9 ± 7.3       |                   |                  |
|                    | Y <sub>in</sub> (PPFD<400)                          | 67.4 ± 6.3        | 79.8 ± 7.9       |                   |                  |
|                    | Y <sub>in</sub> (PPFD<400 $C_i$ >500)               | 89.3 ± 7.8        | 94.1 ± 9.3       |                   |                  |
|                    | Standard                                            | 76.8 ± 7.0        | 85.9 ± 8.5       |                   |                  |
| <i>C. arabica</i>  | $\Phi_{\text{PSII}}/\Phi_{\text{CO}_2}$ ( $A/C_i$ ) | 73.0 ± 3.7        | 136.6 ± 7.1      | 43.2 ± 2.2        | 111.9 ± 3.3      |
|                    | $\Phi_{\text{PSII}}/\Phi_{\text{CO}_2}$ (PPFD>400)  | 57.0 ± 2.6        | 112.7 ± 5.3      |                   |                  |
|                    | Y <sub>in</sub> (PPFD<400)                          | 58.3 ± 2.9        | 116.0 ± 5.7      |                   |                  |
|                    | Y <sub>in</sub> (PPFD<400 $C_i$ >500)               | 83.0 ± 3.8        | 146.3 ± 7.2      |                   |                  |
|                    | Standard                                            | 42.7 ± 2.4        | 97.4 ± 4.8       |                   |                  |
| <i>L. gibertii</i> | $\Phi_{\text{PSII}}/\Phi_{\text{CO}_2}$ ( $A/C_i$ ) | 132.7 ± 13.4      | 228.5 ± 8.7      | 71.7 ± 2.8        | 176.4 ± 6.2      |
|                    | $\Phi_{\text{PSII}}/\Phi_{\text{CO}_2}$ (PPFD>400)  | 101.0 ± 9.5       | 177.0 ± 5.8      |                   |                  |
|                    | Y <sub>in</sub> (PPFD<400)                          | 97.6 ± 10.3       | 177.6 ± 6.4      |                   |                  |
|                    | Y <sub>in</sub> (PPFD<400 $C_i$ >500)               | 127.1 ± 12.2      | 216.6 ± 7.8      |                   |                  |
|                    | Standard                                            | 100.9 ± 10.6      | 181.9 ± 6.6      |                   |                  |

Values are means ± standard error of four to six  $A/C_i$  or  $A/C_c$  curves per species.
